# Supplementary material for: Lipoplexes to Deliver Oligonucleotides in Gram-Positive and Gram-Negative Bacteria: Towards Treatment of Blood Infections
Source: MDPI journal article supplement (doi:10.3390/pharmaceutics13070989), 2021-06-29
Supplement: s1 [file s1]

# Supplementary Materials: Lipoplexes to Deliver Oligonucleotides in Gram-Positive and Gram-Negative Bacteria: Towards Treatment of Blood Infections

Sara Pereira, Rita Sobral Santos, Luís Moreira, Nuno Guimarães, Mariana Gomes, Heyang Zhang, Katrien Remaut, Kevin Breackmans, Stefaan De Smedt and Nuno Filipe Azevedo

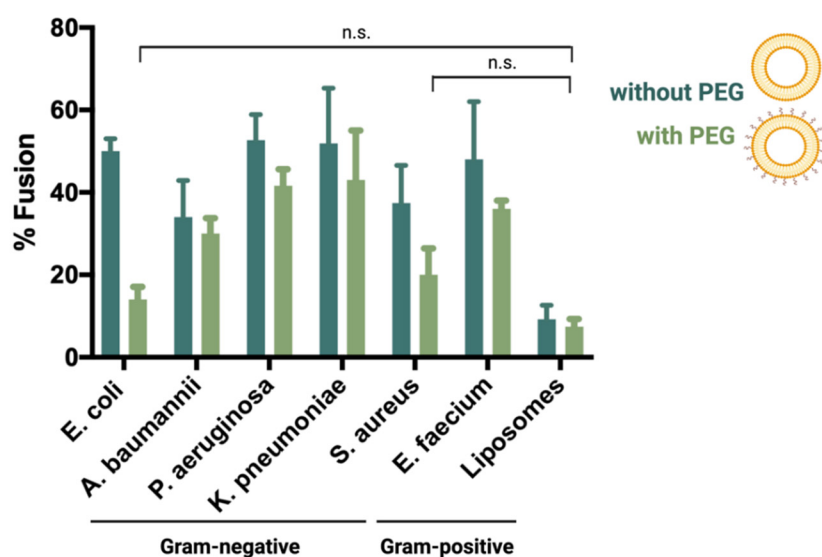

**Figure S1.** A self-fusion control with PEGylated and non-PEGylated liposomes was performed (“liposomes” bars), by mixing labeled and non-labeled liposomes on the same category (PEGylated and non-PEGylated). Three independent experiments were done and the results were compared with fusion with the bacteria. Not significant (n.s.).
